# Supplementary material for: Effect of Red-Beetroot-Supplemented Diet on Gut Microbiota Composition and Metabolite Profile of Weaned Pigs—A Pilot Study
Source: MDPI journal article supplement (doi:10.3390/ani13132196), 2023-07-04
Supplement: s1 [file s1]

Supplementary tables and figures

## Effect of Red-Beetroot-Supplemented Diet on Gut Microbiota Composition and Metabolite Profile of Weaned Pigs – A Pilot Study

Opeyemi O. Adekolurejo <sup>1,2</sup>, Katie McDermott <sup>2</sup>, Henry M. R. Greathead <sup>2</sup>, Helen M. Miller <sup>2</sup>, Alan R. Mackie <sup>1</sup> and Christine Boesch <sup>1,\*</sup>

<sup>1</sup> School of Food Science and Nutrition, University of Leeds, Leeds LS2 9JT, UK;  
o.o.adekolurejo@leeds.ac.uk (O.O.A.); a.r.mackie@leeds.ac.uk (A.R.M.)

<sup>2</sup> Faculty of Biological Sciences, University of Leeds, Leeds LS2 9JT, UK; k.mcdermott@leeds.ac.uk (K.M.); h.m.r.greathead@leeds.ac.uk (H.M.R.G.);  
h.m.miller@leeds.ac.uk (H.M.M.)

\* Correspondence: c.bosch@leeds.ac.uk

**Table S1.** Growth performance and feed intake of weaned pigs

| Parameters       | CON  | ZNO  | RB2  | RB4  | SEM   | <i>P</i> value |
|------------------|------|------|------|------|-------|----------------|
| Initial BW (kg)  | 7.90 | 7.64 | 7.69 | 8.02 | 0.186 | 0.883          |
| Final BW (kg)    | 9.11 | 8.67 | 9.37 | 9.59 | 0.259 | 0.640          |
| Weight gain (kg) | 1.21 | 1.04 | 1.67 | 1.57 | 0.214 | 0.700          |
| ADFI (kg/day)    | 0.18 | 0.17 | 0.25 | 0.26 | 0.016 | 0.104          |
| ADG (kg/day)     | 0.09 | 0.07 | 0.12 | 0.11 | 0.016 | 0.684          |
| FCR              | 2.14 | 2.31 | 2.11 | 2.29 | 0.089 | 0.747          |
| *Fecal score     |      |      |      |      |       |                |
| Day 0            | 2.5  | 3.5  | 2.0  | 2.0  | 0.354 | 0.108          |
| Day 7            | 2.5  | 2.0  | 2.5  | 2.5  | 0.125 | 0.804          |
| Day 14           | 2.0  | 2.0  | 2.0  | 2.0  | 0.000 | 1.000          |

Data presented as mean with standard error of mean (SEM), CON, ZNO, RB2 and RB4 represents; control diet, diet supplemented with zinc oxide, 2% and 4% red beetroot respectively. ADFI; Average daily feed intake, ADG; Average daily gain, FCR; Feed conversion ratio.

\*where 1; firm feces, 2; soft feces, 3; mild diarrhoea, 4; severe diarrhoea and 5; scour.

**Table S2.** Comparison of mean relative abundance of top bacteria genera between diet groups and gut location

| Genera                                  | Diets              |                     |                    |                    | Gut locations      |                    |                    | <sup>d</sup> SEM | P value        |                |                   |
|-----------------------------------------|--------------------|---------------------|--------------------|--------------------|--------------------|--------------------|--------------------|------------------|----------------|----------------|-------------------|
|                                         | CON                | ZNO                 | RB2                | RB4                | Jejunum            | Ileum              | Caecum             |                  | <sup>e</sup> D | <sup>f</sup> L | <sup>g</sup> L* D |
| <i>Megasphaera</i>                      | 35.21 <sup>a</sup> | 15.90 <sup>b</sup>  | 12.49 <sup>b</sup> | 24.95 <sup>a</sup> | 18.18 <sup>b</sup> | 14.57 <sup>b</sup> | 33.66 <sup>a</sup> | 2.78             | 0.011          | 0.007          | 0.441             |
| <i>Streptococcus</i>                    | 22.43 <sup>b</sup> | 33.72 <sup>ab</sup> | 44.77 <sup>a</sup> | 38.81 <sup>a</sup> | 47.03 <sup>a</sup> | 48.97 <sup>a</sup> | 8.79 <sup>b</sup>  | 2.95             | 0.004          | 0.000          | 0.661             |
| <i>Lactobacillus</i>                    | 6.30 <sup>a</sup>  | 4.36 <sup>a</sup>   | 3.73 <sup>a</sup>  | 3.17 <sup>a</sup>  | 4.57 <sup>a</sup>  | 5.40 <sup>a</sup>  | 3.20 <sup>a</sup>  | 0.48             | 0.104          | 0.161          | 0.594             |
| <i>Lactococcus</i>                      | 5.20 <sup>a</sup>  | 4.04 <sup>a</sup>   | 5.68 <sup>a</sup>  | 3.03 <sup>a</sup>  | 8.53 <sup>a</sup>  | 4.84 <sup>b</sup>  | 0.9 <sup>c</sup>   | 0.75             | 0.511          | 0.000          | 0.605             |
| <i>Lactobacillales_unclassified</i>     | 4.55 <sup>b</sup>  | 7.62 <sup>a</sup>   | 6.08 <sup>a</sup>  | 6.75 <sup>a</sup>  | 7.14 <sup>a</sup>  | 9.27 <sup>a</sup>  | 2.33 <sup>b</sup>  | 0.58             | 0.166          | 0.000          | 0.376             |
| <i>Mitsuokella</i>                      | 3.51 <sup>a</sup>  | 2.23 <sup>a</sup>   | 1.38 <sup>a</sup>  | 2.49 <sup>a</sup>  | 3.35 <sup>a</sup>  | 2.54 <sup>a</sup>  | 1.31 <sup>a</sup>  | 0.53             | 0.575          | 0.303          | 0.846             |
| <i>Veillonellaceae_unclassified</i>     | 2.73 <sup>a</sup>  | 0.12 <sup>b</sup>   | 0.07 <sup>b</sup>  | 0.25 <sup>b</sup>  | 0.94 <sup>a</sup>  | 0.96 <sup>a</sup>  | 0.49 <sup>a</sup>  | 0.30             | 0.003          | 0.750          | 0.895             |
| <i>Selenomonadaceae_unclassified</i>    | 1.95 <sup>a</sup>  | 0.12 <sup>a</sup>   | 1.19 <sup>a</sup>  | 0.35 <sup>a</sup>  | 0.36 <sup>b</sup>  | 0.24 <sup>b</sup>  | 2.11 <sup>a</sup>  | 0.32             | 0.139          | 0.024          | 0.518             |
| <i>Olsenella</i>                        | 1.89 <sup>a</sup>  | 0.68 <sup>ab</sup>  | 0.24 <sup>b</sup>  | 0.36 <sup>b</sup>  | 0.82 <sup>a</sup>  | 1.03 <sup>a</sup>  | 0.53 <sup>a</sup>  | 0.18             | 0.004          | 0.494          | 0.171             |
| <i>Bifidobacterium</i>                  | 1.63 <sup>a</sup>  | 0.46 <sup>ab</sup>  | 0.12 <sup>b</sup>  | 0.60 <sup>ab</sup> | 0.60 <sup>a</sup>  | 0.99 <sup>a</sup>  | 0.52 <sup>a</sup>  | 0.17             | 0.011          | 0.468          | 0.778             |
| <i>Phascolarctobacterium</i>            | 1.42 <sup>a</sup>  | 3.75 <sup>a</sup>   | 3.98 <sup>a</sup>  | 3.06 <sup>a</sup>  | 0.03 <sup>b</sup>  | 0.04 <sup>b</sup>  | 9.09 <sup>a</sup>  | 0.66             | 0.245          | 0.000          | 0.222             |
| <i>Streptococcaceae_unclassified</i>    | 1.36 <sup>a</sup>  | 2.14 <sup>a</sup>   | 1.75 <sup>a</sup>  | 1.58 <sup>a</sup>  | 2.94 <sup>a</sup>  | 1.97 <sup>b</sup>  | 0.22 <sup>c</sup>  | 0.19             | 0.322          | 0.000          | 0.829             |
| <i>Firmicutes_unclassified</i>          | 1.08 <sup>a</sup>  | 0.83 <sup>a</sup>   | 0.92 <sup>a</sup>  | 0.67 <sup>a</sup>  | 0.30 <sup>b</sup>  | 0.46 <sup>b</sup>  | 1.86 <sup>a</sup>  | 0.10             | 0.238          | 0.000          | 0.004             |
| <i>Bacteria_unclassified</i>            | 0.95 <sup>a</sup>  | 1.37 <sup>a</sup>   | 1.13 <sup>a</sup>  | 1.26 <sup>a</sup>  | 0.17 <sup>b</sup>  | 0.28 <sup>b</sup>  | 3.09 <sup>a</sup>  | 0.21             | 0.796          | 0.000          | 0.800             |
| <i>Erysipelotrichaceae_unclassified</i> | 0.64 <sup>ab</sup> | 1.35 <sup>a</sup>   | 0.23 <sup>b</sup>  | 0.15 <sup>b</sup>  | 0.29 <sup>b</sup>  | 0.36 <sup>ab</sup> | 1.12 <sup>a</sup>  | 0.15             | 0.006          | 0.018          | 0.001             |
| <i>Negativibacillus</i>                 | 0.44 <sup>b</sup>  | 1.91 <sup>a</sup>   | 1.29 <sup>ab</sup> | 0.30 <sup>b</sup>  | 0.009 <sup>b</sup> | 0.004 <sup>b</sup> | 2.94 <sup>a</sup>  | 0.29             | 0.075          | 0.000          | 0.038             |
| <i>Anaerovibrio</i>                     | 0.30 <sup>b</sup>  | 0.26 <sup>b</sup>   | 1.09 <sup>a</sup>  | 2.03 <sup>a</sup>  | 0.027 <sup>b</sup> | 0.014 <sup>b</sup> | 2.72 <sup>a</sup>  | 0.29             | 0.036          | 0.000          | 0.012             |
| <i>Bacilli_unclassified</i>             | 0.29 <sup>b</sup>  | 0.64 <sup>ab</sup>  | 0.99 <sup>a</sup>  | 0.67 <sup>ab</sup> | 0.68 <sup>ab</sup> | 0.89 <sup>a</sup>  | 0.38 <sup>b</sup>  | 0.07             | 0.000          | 0.001          | 0.003             |
| <i>Rumminococcaceae_unclassified</i>    | 0.29 <sup>b</sup>  | 0.97 <sup>a</sup>   | 0.43 <sup>ab</sup> | 0.23 <sup>b</sup>  | 0.01 <sup>b</sup>  | 0.01 <sup>b</sup>  | 1.42 <sup>a</sup>  | 0.12             | 0.013          | 0.000          | 0.002             |
| <i>Terrisporobacter</i>                 | 0.19 <sup>c</sup>  | 3.41 <sup>a</sup>   | 2.16 <sup>ab</sup> | 1.10 <sup>bc</sup> | 0.48 <sup>b</sup>  | 1.66 <sup>ab</sup> | 3.00 <sup>a</sup>  | 0.31             | 0.000          | 0.001          | 0.015             |
| <i>Clostridiaceae_unclassified</i>      | 0.17 <sup>b</sup>  | 2.15 <sup>a</sup>   | 1.50 <sup>ab</sup> | 1.14 <sup>ab</sup> | 0.16 <sup>b</sup>  | 1.97 <sup>a</sup>  | 1.59 <sup>a</sup>  | 0.24             | 0.013          | 0.002          | 0.111             |

Values represents mean abundance genera for each diet and gut location, significant differences indicated by different letters within diet groups and gut location. ANOVA and Tukey's HSD test was used to check for significant differences between the means. CON, ZNO, RB2 and RB4 represents control diet, diets supplemented with zinc oxide, 2% and 4% red beetroot respectively. <sup>d</sup> overall mean for each phylum, <sup>d</sup> Standard error of mean, <sup>e</sup> *p* value for significant effect of diets, <sup>f</sup> *p* value for significant effect of gut locations, <sup>g</sup> *p* value interaction between gut location and diets.

(a) Jejunum

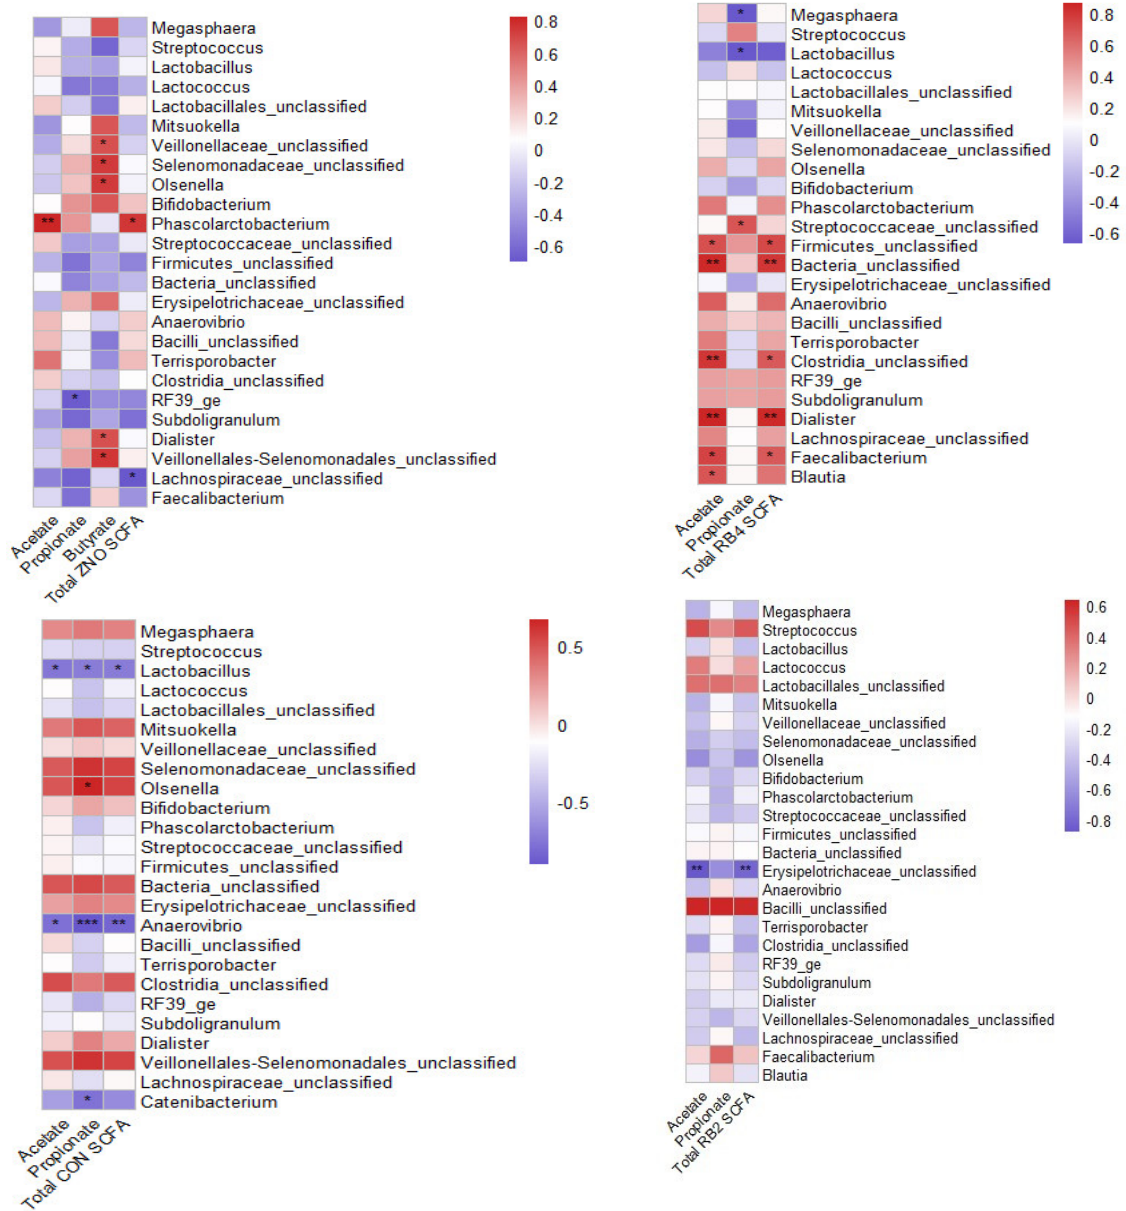

(b) Ileum

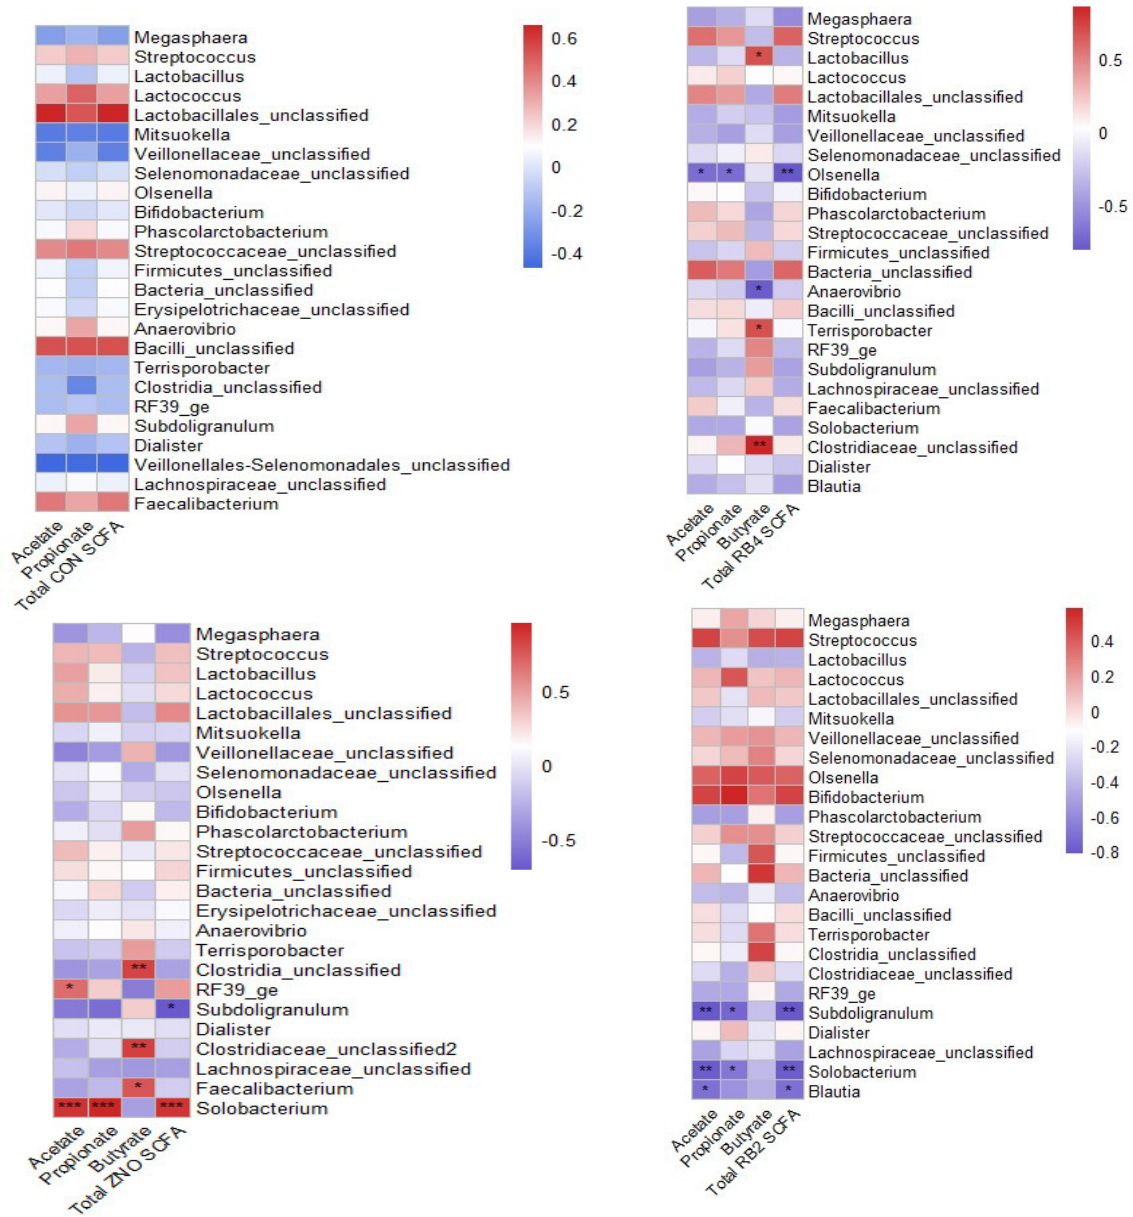

**Figure S1.** Spearman correlation matrices between top abundant bacteria genera and short chain fatty acids in the (a) jejunum (b) ileum. Omitted fatty acids were not detected in the corresponding location hence not shown, color depth depicts correlation between genera and gut metabolite where red color denotes a positive correlation and blue color a negative correlation. The strength of association between the subjects is indicated by the color intensity, \*\*\*  $P \leq 0.001$ , \*\*  $P \leq 0.01$ , \*  $P \leq 0.05$ . CON, ZNO, RB2 and RB4 represent control diet and diets supplemented with zinc oxide, 2% and 4% red beetroot respectively.

(a) Ileum

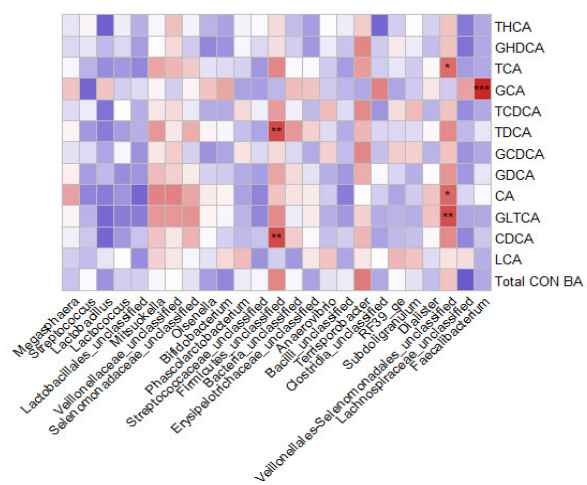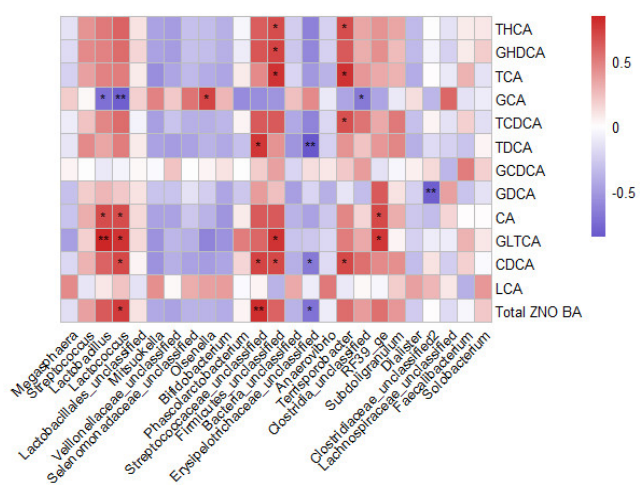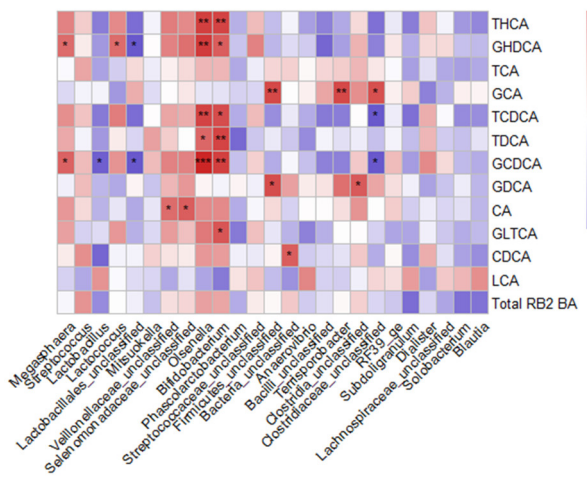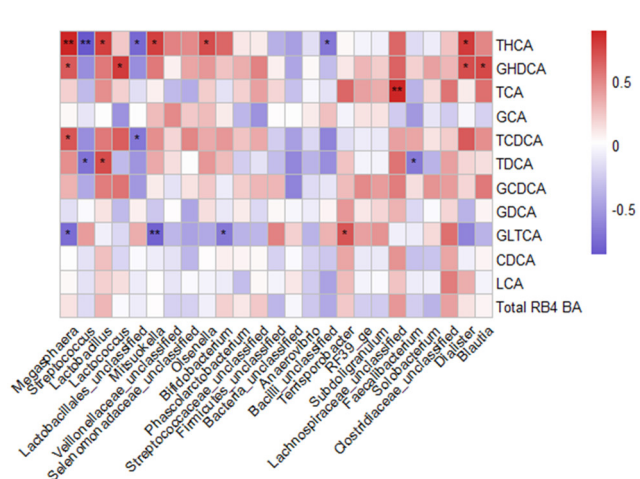

(b) Caecum

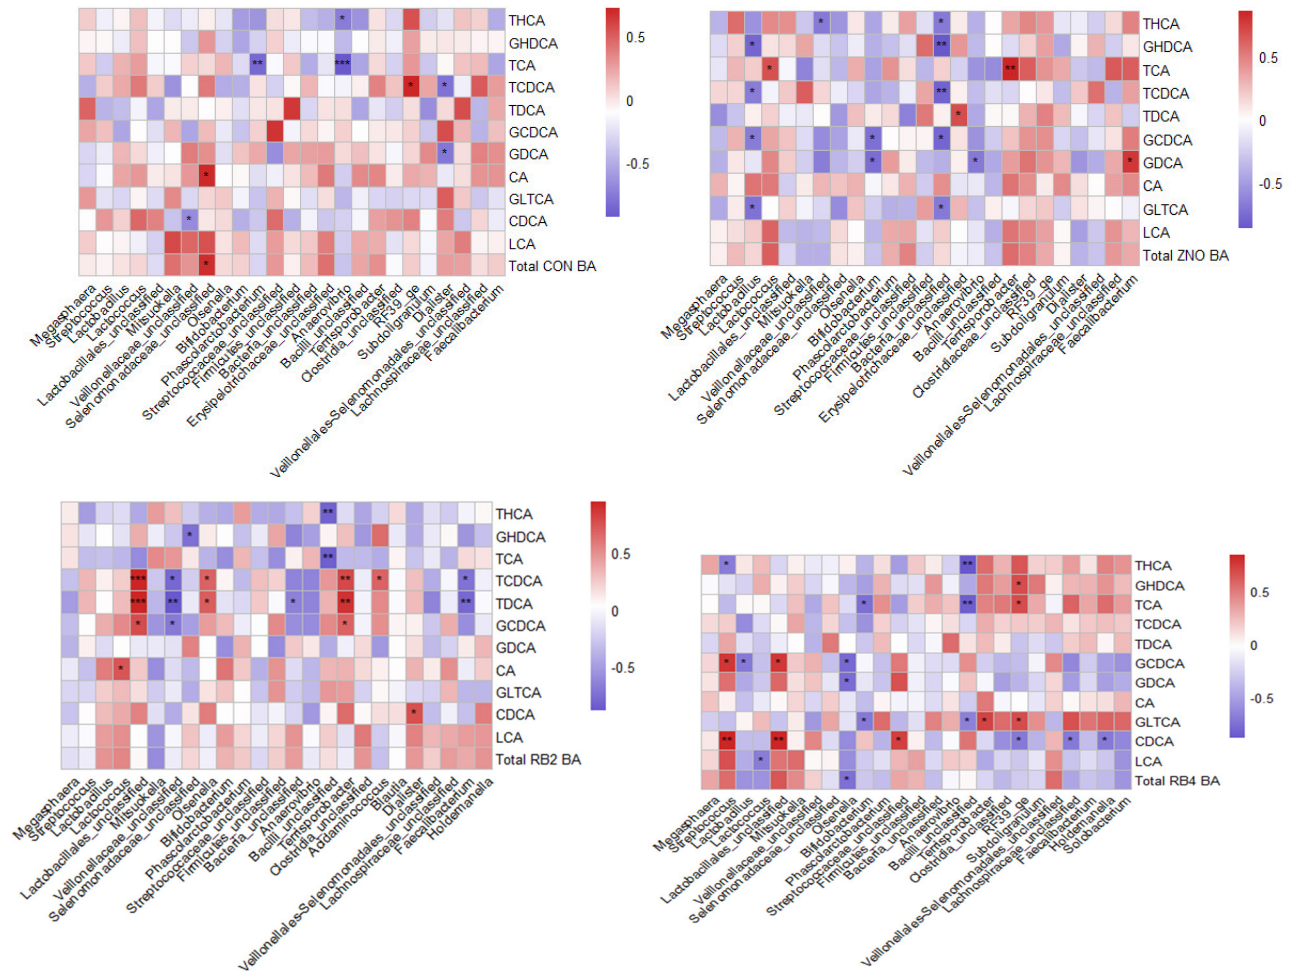

**Figure S2.** Spearman correlation matrices between top abundant bacteria genera and bile acid levels in the (a) ileum (b) caecum. Omitted bile acid (deoxycholic acid - DCA) was not detected in the jejunum for the pigs hence not shown. Correlation depicted by color depth, where red denotes a positive and blue a negative correlation. The strength of association between the subjects is indicated by the color intensity and \*\*\*  $P \leq 0.001$ , \*\*  $P \leq 0.01$ , \*  $P \leq 0.05$ ). CON, ZNO, RB2 and RB4 represent control and diets supplemented with zinc oxide, 2% and 4% red beetroot respectively. Taurohyodeoxycholic acid (THCA), glycohyodeoxycholic acid (GHCA), taurocholic acid (TCA), glycocholic acid (GCA), taurochenodeoxycholic acid (TCDCA), taurodeoxycholic acid (TDCA), glycochenodeoxycholic acid (GCDCA), glycodeoxycholic acid (GDCA), cholic acid (CA), glycolithocholic acid (GLTHCA), chenodeoxycholic.
